# Supplementary material for: Capturing sex differences in frequent and spontaneous fluctuations of heart rate
Source: Research Square preprint supplement (doi:10.21203/rs.3.rs-8671336/v1), 2026-02-03
Supplement: Supplementary file 1 [file cb4cdcec1065cb744e8005c5.docx]

**Supplementary Table 1.** Examining differences in graph theory and HRV metrics between across the three different projects data were pooled from.

|  | | USA: Edens | | |  | Norway: Bergen 1 | | | |  | Norway: Bergen 2 | | | | Analysis |
| --- | --- | --- | --- | --- | --- | --- | --- | --- | --- | --- | --- | --- | --- | --- | --- |
|  | | M | SD | |  | M | | SD | |  | M | | SD | | *F* |
| Edges2+2 | | 0.75 | 0.33 | |  | 0.71 | | 0.31 | |  | 0.71 | | 0.41 | | 0.43 |
| Edges10+10 | | 2.94 | 0.97 | |  | 2.68 | | 1.12 | |  | 3.06 | | 1.39 | | 1.90 |
| lnRMSSD | | 3.92 | 0.62 | |  | 3.94 | | 0.51 | |  | 4.04 | | 0.68 | | 0.94 |
| lnHF-HRV | | 6.99 | 1.19 | |  | 7.00 | | 1.02 | |  | 7.16 | | 1.36 | | 0.49 |
| lnLF-HRV | | 7.16 | 0.87 | |  | 7.49 | | 1.15 | |  | 7.03 | | 1.16 | | 3.63* |
| Note. *p <0.05; F test: ANOVA, df= 2,266; post-hoc tests showed significant | | | | | | | | | | | | | | | |
| difference between LF values obtained in Bergen 1 and Bergen 2.  **Supplementary Table 2.** Bivariate correlations between graph theory metrics and linear and nonlinear HRV metrics. | | | | | | | | | | | | | | | |
|  | SamEn | | | ApEn | | | SD1 (ms) | | SD2 (ms) | | | DFA𝛂1 | |
| Edges2+2 | -0.04 | | | 0.14* | | | -0.28** | | -0.34** | | | -0.35** | |
| Edges10+10 | 0.14* | | | 0.24** | | | -0.21** | | -0.39** | | | 0.10 | |
| lnRMSSD | -0.11 | | | -0.38** | | | 0.88** | | 0.82** | | | -0.66** | |
| lnHF-HRV | -0.10 | | | -0.35** | | | 0.83** | | 0.77** | | | -0.68** | |
| lnLF-HRV | -0.35** | | | -0.50** | | | 0.56** | | 0.82** | | | 0.02 | |
| Note.**p* <0.05; ***p* <0.01. | | | | | | | | | | | | | |

**Supplementary Table 3.** The oddsratio from the logistic regression models of edges 2+2 and nonlinear HRV metrics.

|  |  |  | 95% CI for OR | |  |  |
| --- | --- | --- | --- | --- | --- | --- |
|  |  | Odds ratios (OR) | Lower | Upper | *p* | R2* |
| Model 1 | Age | 0.974 | 0.896 | 1.058 | 0.533 | 0.051 |
|  | BMI | 1.043 | 0.981 | 1.109 | 0.176 |  |
|  | Edges 2+2 | 2.793 | 1.323 | 5.897 | 0.007 |  |
|  | SamEn | 1.120 | 0.509 | 2.465 | 0.777 |  |
| Model 2 | Age | 0.967 | 0.890 | 1.052 | 0.439 | 0.055 |
|  | BMI | 1.048 | 0.985 | 1.114 | 0.140 |  |
|  | Edges 2+2 | 2.941 | 1.373 | 6.303 | 0.006 |  |
|  | ApEn | 0.341 | 0.036 | 3.195 | 0.346 |  |
| Model 3 | Age | 0.972 | 0.895 | 1.057 | 0.511 | 0.063 |
|  | BMI | 1.044 | 0.982 | 1.111 | 0.166 |  |
|  | Edges 2+2 | 3.362 | 1.514 | 7.467 | 0.003 |  |
|  | SD1 (ms) | 1.006 | 0.998 | 1.014 | 0.129 |  |
| Model 4 | Age | 0.968 | 0.890 | 1.052 | 0.446 | 0.055 |
|  | BMI | 1.047 | 0.984 | 1.114 | 0.145 |  |
|  | Edges 2+2 | 3.166 | 1.417 | 7.072 | 0.005 |  |
|  | SD2 (ms) | 1.003 | 0.996 | 1.010 | 0.358 |  |
| Model 5 | Age | 0.972 | 0.895 | 1.056 | 0.504 | 0.051 |
|  | BMI | 1.043 | 0.981 | 1.109 | 0.176 |  |
|  | Edges 2+2 | 2.711 | 1.227 | 5.991 | 0.014 |  |
|  | DFA𝛂1 | 1.093 | 0.415 | 2.880 | 0.857 |  |
| Note. N= 269. *Ngelkerke R square. | | | | | | |

**Supplementary Table 4.** Bivariate correlations between graph theory metrics, HRV metrics, and other graph-theoretical metrics not included in the current study.

|  | Missing_edges | Bridges | Cliques |
| --- | --- | --- | --- |
| Edges2+2 | -.983** | .685** | .936** |
| Edges10+10 | -.815** | .746** | .736** |
| lnRMSSD | .465** | -.372** | -.385** |
| lnHF-HRV | .486** | -.403** | -.402** |
| lnLF-HRV | .245** | -.264** | -.200** |
|  |  |  |  |
| Missing_edges |  | -.633** | -.938** |
| Bridges |  |  | .392** |
