# Supplementary material for: Capturing sex differences in frequent and spontaneous fluctuations of heart rate
Source: Research Square preprint supplement (doi:10.21203/rs.3.rs-8671336/v1), 2026-02-03
Supplement: Supplementary file [file 808f7a8a73b78706be818aba.pdf]

## Flow Chart for Sample Inclusion

### 1. Pooled Sample: N = 289

USA: EDENS  
N = 147

Norway: Bergen 1  
N = 62

Norway: Bergen 2  
N = 80

### 2. Excluded Participants: n = 20

USA: EDENS

*n = 2; no data on age  
and sex  
n = 2: > 30 years old  
n = 3: Extreme outliers  
on the graph  
theory indices*

Norway: Bergen 1

*n = 1: > 30 year old*

Norway: Bergen 2

*n = 11: > 30 years old  
n = 1: Extreme outliers  
on the graph  
theory indices*

### 3. Final Pooled Sample: N = 269

USA: EDENS  
N = 140

Norway: Bergen 1  
N = 61

Norway: Bergen 2  
N = 68
